# Supplementary material for: LncRNAs Associated with Neuronal Development and Oncogenesis Are Deregulated in SOD1-G93A Murine Model of Amyotrophic Lateral Sclerosis
Source: MDPI journal article supplement (doi:10.3390/biomedicines9070809), 2021-07-13
Supplement: s1 [file s1]

**Supplementary Table S1. Primers list**

| <b>Primers Mouse:</b>                                 |
|-------------------------------------------------------|
| m- <i>linc-Brn1a</i> FW: CATCGAGGGAGAGGGACAGAG;       |
| m- <i>linc-Brn1a</i> REV: CCAAAGCACCATTTTCATCACATCAG; |
| m- <i>linc-Brn1b</i> FW: TGCCAGCTTGGCTTGACTC;         |
| m- <i>linc-Brn1b</i> REV: GCTCCCAAAGGTTCTGTGTC;       |
| m- <i>linc-Enc1</i> FW: CCTCCCTGATCTCTTTGCTTCC;       |
| m- <i>linc-Enc1</i> REV: CGACCACTGGTTCTGCACTC;        |
| m- <i>Fendrr</i> FW: GGCCACAGCGGTCAGTTAC;             |
| m- <i>Fendrr</i> REV: TCTGGTGGAGTCAGATCAAACG;         |
| m- <i>Hottip</i> FW: GGCTTTGGGCTGCATCTTTG;            |
| m- <i>Hottip</i> REV: GTCCTTCCACGACAGGGATAC;          |
| m- <i>linc-p21</i> FW: AGTAGGGTGTTGTTCAAGTTGGTAG;     |
| m- <i>linc-p21</i> REV: TCACAGGTATGAGGTGCAGAC;        |
| m- <i>Tug1</i> FW: TGAAGTGGCCAGAAAGTTGTAAG;           |
| m- <i>Tug1</i> REV: GCAAGCAGGTCTGTGAGACTATTC;         |
| m- <i>Eldrr</i> FW: GAGCTACCAGGGAGGTGAAG;             |
| m- <i>Eldrr</i> REV: AGCTCAAGGGTTCTATGATGAGAG;        |
| m- <i>p53</i> FW: CCTCATCCTCCTCCTTCCCA                |
| m- <i>p53</i> REV: GGCAGTCATCCAGTCTTCGG               |
| m- <i>p21</i> FW: TGAATGGAGACAGAGACCCCA               |
| m- <i>p21</i> REV: CATGAGCGCATCGCAATCAC               |
| m- <i>Tril</i> FW: AAGGGCCTCCAGGTGGGCTGGAATCGGAC;     |
| m- <i>Tril</i> REV: CTCGTGCTCCTGCCTGGCCCTCAGGCTGCA;   |
| m- <i>Tlr4</i> FW: GACAAGGGCCCTGAGGAGGAGGAGAACAAG;    |
| m- <i>Tlr4</i> REV: TTATAGCTCAGGTTGAGAATGGAGGAGAGT;   |
| m- <i>Gapdh</i> FW: CCAGGGCTGCCATTTGCAGTGGCAAAGTGG;   |
| m- <i>Gapdh</i> REV: CCTGGAAGATGGTGATGGGCTTCCCCTTGA.  |
| <b>Primers Human:</b>                                 |
| h- <i>ELDRR</i> FW: TCCACAGGCTTAATGCATCTC;            |
| h- <i>ELDRR</i> REV: TGCCAAGGTTAAGCAGACAG;            |
| h- <i>PANTR1</i> FW: GGTTTTCTGTTTCCTGCTC;             |
| h- <i>PANTR1</i> REV: GCAGTGATTCTTTGAGGGAAA;          |
| h- <i>HOTTIP</i> FW: TTCTGCAGTGAGACCACAGG;            |
| h- <i>HOTTIP</i> REV: AACAGTGTGGACAGGGAAGG;           |

|                                                    |
|----------------------------------------------------|
| h- <i>FENDRR</i> FW: CTGGACGGGAACGCTGGAGT;         |
| h- <i>FENDRR</i> REV: TCTCGGCACCACCTTTCGTG.        |
| h- <i>TUG1</i> FW: ACTGTGCAGAAGCCCAGAGT;           |
| h- <i>TUG1</i> REV: ATATTGCTCTGGGGCAGT;            |
| h- <i>TP53COR</i> FW: GGGTGGCTCACTCTTGGC;          |
| h- <i>TP53COR</i> REV: TGGCCTTGCCCGGGCTTGTC;       |
| h- <i>18S</i> -FW: GGATCACTAGGTGATATCGAGC;         |
| h- <i>18S</i> -REV: ACCAGACAAGAGTTTAAGAGATATGTATC; |
